# Supplementary material for: Utility, promise, and limitations of liquid chromatography‐mass spectrometry‐based therapeutic drug monitoring in precision medicine
Source: PubMed Central journal article supplement — J Mass Spectrom. 2021 Nov 4;56(11):e4788. doi: 10.1002/jms.4788 (PMC8597589; doi:10.1002/jms.4788), 2021-11-04
Supplement: JMS-56-e4788-s001.pdf [file JMS-56-e4788-s001.pdf]

### Supplemental Table S1: TDM assays being used in diagnostic laboratories

Sources: (a) ARUP Consult. <https://arupconsult.com/content/therapeutic-drug-monitoring>. (Accessed Mar. 22, 2021).

(b) Mayo Clinic Laboratories. <https://www.mayocliniclabs.com/test-info/drug-book/therapeutic.html>. (Accessed Mar. 22, 2021).

| Drug                                 | Type of Drug                 | Technique         | Source |
|--------------------------------------|------------------------------|-------------------|--------|
| 5-Fluorocytosine                     | Antifungal                   | Bioassay          | a      |
| 5-Fluorocytosine                     | Antifungal                   | LC-MS             | b      |
| Acetaminophen                        | Nonopioid Pain Medication    | Spectrophotometry | a      |
| Adalimumab                           | Antibody Therapeutic         | Immunoassay       | a      |
| Alprazolam                           | Sedatives                    | LC-MS             | a      |
| Amikacin                             | Antibiotic                   | Immunoassay       | a      |
| Amiodarone                           | Antiarrhythmic               | LC-MS             | a      |
| Amitriptyline and Nortriptyline      | Antidepressant               | LC-MS             | a b    |
| Aripiprazole                         | Antipsychotic                | LC-MS             | a      |
| Azithromycin                         | Antibiotic                   | HPLC              | a      |
| Aztreonam                            | Antibiotic                   | Bioassay          | a      |
| Barbiturates                         | Sedatives                    | GC-MS             | a      |
| Benzodiazepines                      | Sedatives                    | LC-MS             | a      |
| Benzodiazepines                      | Sedatives                    | Immunoassay       | a      |
| Buprenorphine                        | Opioids                      | LC-MS             | a      |
| Bupropion                            | Antidepressant               | LC-MS             | a      |
| Busulfan                             | Anti-cancer                  | LC-MS             | b      |
| Butalbital                           | Pain management              | GC-MS             | b      |
| Carbamazepine                        | Anticonvulsant/Antiepileptic | LC-MS             | a      |
| Carbamazepine                        | Anticonvulsant/Antiepileptic | Immunoassay       | a      |
| Ceftazidime                          | Antibiotic                   | Bioassay          | a      |
| Chlordiazepoxide                     | Sedative                     | LC-MS             | b      |
| Chlorpromazine                       | Antipsychotic                | LC-MS             | a      |
| Citalopram                           | Antidepressant               | LC-MS             | a b    |
| Clobazam                             | Anticonvulsant/Antiepileptic | LC-MS             | a      |
| Clomipramine                         | Antidepressant               | LC-MS             | a b    |
| Clonazepam                           | Sedatives                    | LC-MS             | a      |
| Clonazepam and 7-Aminoclonazepam     | Antiepileptic Drugs          | LC-MS             | b      |
| Clonidine                            | Antihypertensive             | LC-MS             | a      |
| Clorazepate (Assayed as Nordiazepam) | Sedatives                    | LC-MS             | a      |
| Clozapine                            | Antipsychotic                | LC-MS             | a b    |
| Cyclosporine                         | Immunosuppressant            | LC-MS             | a b    |
| Desipramine                          | Antidepressant               | LC-MS             | a b    |
| Diazepam and Nordiazepam             | Antidepressant/Sedative      | LC-MS             | a b    |
| Digitoxin                            | Antiarrhythmic               | Immunoassay       | a      |
| Doxepin                              | Antidepressant               | LC-MS             | a      |
| Doxepin and Nordoxepin               | antidepressant               | LC-MS             | b      |
| Duloxetine                           | antidepressant               | LC-MS             | b      |
| Escitalopram                         | Antidepressant               | LC-MS             | a      |
| Ethambutol                           | Antibiotic                   | LC-MS             | a      |
| Ethosuximide                         | Anticonvulsant/Antiepileptic | Immunoassay       | a      |
| Everolimus                           | Immunosuppressant            | LC-MS             | a b    |
| Felbamate                            | Anticonvulsant/Antiepileptic | HPLC              | a      |

|                                  |                              |                    |     |
|----------------------------------|------------------------------|--------------------|-----|
| Felbamate (Felbatol)             | Anticonvulsant/Antiepileptic | LC-MS              | b   |
| Fentanyl                         | Opioids                      | LC-MS              | a b |
| Flecainide                       | Antiarrhythmic               | LC-MS              | a b |
| Fluconazole                      | Antifungal                   | LC-MS              | a   |
| Fluoxetine                       | antidepressant               | LC-MS              | b   |
| Fluoxetine                       | Antidepressant               | GC-MS              | a   |
| Fluphenazine                     | Antipsychotic                | LC-MS              | a   |
| Fluvoxamine                      | Antidepressant               | GC                 | a   |
| Gabapentin                       | Anticonvulsant/Antiepileptic | LC-MS              | a b |
| Gentamicin                       | Antibiotic                   | Immunoassay        | a   |
| Haloperidol                      | Antipsychotic                | LC-MS              | a b |
| Heparin                          | Anticoagulants               | Chromogenic Assay  | a   |
| Hydroxychloroquine               | Anti-rheumatic               | LC-MS              | b   |
| Ibuprofen                        | Nonopioid Pain Medication    | HP                 | a   |
| Imatinib                         | Oncology                     | Immunoturbidimetry | a   |
| Imipramine and Desipramine       | Antidepressant               | LC-MS              | a b |
| Infliximab                       | Anti-rheumatic drug          | Immunoassay        | a   |
| Infliximab                       | Anti-rheumatic drug          | LC-MS              | b   |
| Itraconazole                     | Antifungal                   | LC-MS              | a b |
| Keppra                           | Anticonvulsant/Antiepileptic | Immunoassay        | a   |
| Ketamine                         | Sedatives                    | GC-MS              | a   |
| Lacosamide                       | Anticonvulsant/Antiepileptic | LC-MS              | a b |
| Lamotrigine                      | Anticonvulsant/Antiepileptic | Immunoassay        | a   |
| Lamotrigine                      | Anticonvulsant/Antiepileptic | LC-MS              | b   |
| Leflunomide                      | Anti-rheumatic               | LC-MS              | a b |
| Levetiracetam                    | Anticonvulsant               | LC-MS              | b   |
| Librium and Nordiazepam          | Sedatives                    | LC-MS              | a   |
| Lithium                          | Antipsychotic                | Colorimetry        | a   |
| Lorazepam                        | Sedatives                    | LC-MS              | a   |
| Lurasidone                       | Antipsychotic                | LC-MS              | a   |
| Mephobarbital and Phenobarbital  | Anticonvulsant               | GC-MS              | b   |
| Meropenem                        | Antibiotic                   | Bioassay           | a   |
| Methadone                        | Opioids                      | LC-MS              | a b |
| Methotrexate                     | Immunosuppressant/Oncology   | Immunoassay        | a   |
| Methotrexate Post Glucarpidase   | Immunosuppressants           | LC-MS              | b   |
| Metoprolol                       | Antihypertensive             | LC-MS              | a   |
| Mexiletine                       | Antiarrhythmic               | LC-MS              | a b |
| Mitotane                         | Oncology                     | GC                 | a   |
| Mycophenolic Acid                | Immunosuppressant            | LC-MS              | a b |
| Nafcillin                        | Antibiotic                   | Bioassay           | a   |
| Natalizumab                      | Antibody Therapeutic         | Immunoassay        | a   |
| Nicotine                         |                              | LC-MS              | b   |
| Nortriptyline                    | Antidepressant               | LC-MS              | a b |
| Olanzapine                       | Antipsychotic                | LC-MS              | a   |
| Opiates                          | Opioids                      | LC-MS              | a   |
| Oxcarbazepine                    | Anticonvulsant               | LC-MS              | b   |
| Oxcarbazepine or Eslicarbazepine | Anticonvulsant/Antiepileptic | LC-MS              | a   |
| Paliperidone                     | Antipsychotic                | LC-MS              | a   |

|                                   |                              |                   |     |
|-----------------------------------|------------------------------|-------------------|-----|
| Paroxetine                        | Antidepressant               | LC-MS             | b   |
| Pentobarbital                     | Sedatives                    | GC-MS             | a b |
| Perampanel                        | Anticonvulsant/Antiepileptic | LC-MS             | a   |
| Phenobarbital                     | Anticonvulsant/Antiepileptic | Immunoassay       | a   |
| Phenobarbital                     | Anticonvulsant/Antiepileptic | LC-MS             | a   |
| Phenytoin                         | Anticonvulsant/Antiepileptic | Immunoassay       | a   |
| Piperacillin                      | Antibiotic                   | Bioassay          | a   |
| Posaconazole                      | Antifungal                   | LC-MS             | a b |
| Prazepam (Assayed as Nordiazepam) | Sedatives                    | LC-MS             | a   |
| Pregabalin                        | Anticonvulsant/Antiepileptic | LC-MS             | a b |
| Primidone                         | Anticonvulsant/Antiepileptic | Immunoassay       | a   |
| Procainamide and NAPA             | Antiarrhythmic               | Immunoassay       | a   |
| Propafenone                       | Antiarrhythmic               | LC-MS             | b   |
| Propoxyphene                      | Opioids                      | LC-MS             | a   |
| Protriptyline                     | Antidepressant               | LC-MS             | a   |
| Quetiapine                        | Antipsychotic                | LC-MS             | a   |
| Ribavirin                         | Antiviral                    | LC-MS             | b   |
| Rifampin                          | Antibiotic                   | LC-MS             | a   |
| Risperidone                       | Antipsychotic                | LC-MS             | a   |
| Rufinamide                        | Anticonvulsant/Antiepileptic | LC-MS             | a b |
| Salicylate                        | Nonopioid Pain Medication    | Spectrophotometry | a   |
| Secobarbital                      | Barbiturate                  | GC-MS             | b   |
| Sertraline                        | Antidepressant               | LC-MS             | a   |
| Sirolimus                         | Immunosuppressant            | LC-MS             | a b |
| Streptomycin                      | Antibiotic                   | HPLC              | a   |
| Sulfamethoxazole                  | antibiotic                   | LC-MS             | b   |
| Sulfonamides                      | Antibiotic                   | Spectrophotometry | a   |
| Tacrolimus                        | Immunosuppressant            | LC-MS             | a b |
| Tapentadol                        | Opioids                      | LC-MS             | a   |
| Thiamin (Vitamin B1)              | Vitamin                      | LC-MS             | b   |
| Thiopurine                        | Oncology                     | LC-MS             | a   |
| Tiagabine Quantitative            | Anticonvulsant/Antiepileptic | LC-MS             | a   |
| Ticarcillin                       | Antibiotic                   | Bioassay          | a   |
| Topiramate                        | Anticonvulsant/Antiepileptic | LC-MS             | b   |
| Topiramate                        | Anticonvulsant/Antiepileptic | Immunoassay       | a   |
| Tramadol                          | Opioids                      | LC-MS             | a   |
| Trazodone                         | Antidepressant               | LC-MS             | a   |
| Trimethoprim                      | Antibiotic                   | LC-MS             | b   |
| Trimipramine                      | Antidepressant               | LC-MS             | b   |
| Valproic Acid                     | Anticonvulsant/Antiepileptic | Immunoassay       | a   |
| Vancomycin                        | Antibiotic                   | Immunoassay       | a   |
| Venlafaxine                       | Antidepressant               | LC-MS             | a b |
| Vigabatrin                        | Anticonvulsant/Antiepileptic | LC-MS             | a   |
| Voriconazole                      | Antifungal                   | LC-MS             | a b |
| Warfarin                          | Anticoagulants               | LC-MS             | a   |
| Ziprasidone                       | Antipsychotic                | LC-MS             | a   |
| Zolpidem                          | Sedatives                    | LC-MS             | a   |
| Zonisamide                        | Anticonvulsant/Antiepileptic | LC-MS             | b   |

Zonisamide

Anticonvulsant/Antiepileptic

Immunoassay

a
